# Supplementary material
Source: Springer Nature journal article supplement (https://www.springermedizin.de/resource/supplementary/13256_2013_2658_MOESM5_ESM.pdf/9650186)

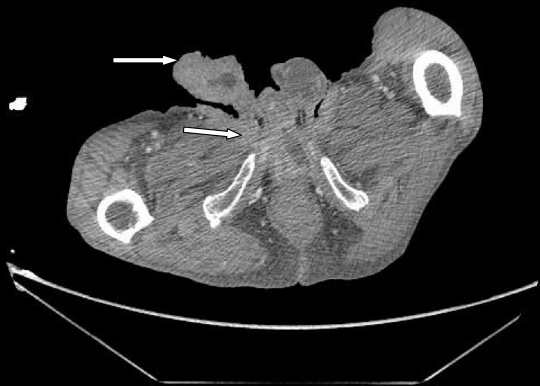

Supplement: MOESM5 [file 9650186]
